# Supplementary material for: Epigenetic dysregulated long non-coding RNAs in renal cell carcinoma based on multi-omics data and their influence on target drugs sensibility
Source: Front Genet. 2024 Aug 2;15:1406150. doi: 10.3389/fgene.2024.1406150 (PMC11327069; doi:10.3389/fgene.2024.1406150)
Supplement: Supplementary file 5 [file Table1.XLSX]

## Sheet: Sheet1
PVT1-f	CCTGTGACCTGTGGAGACAC
PVT1-r	GTCCGTCCAGAGTGCTGAAA
MIAT-f	CACTGCTCCTGGATTCTGTTCTTGG
MIAT-r	AACGCTGGGACTGTCTCCTCTG
LUCAT1-f	AGATGGATAAACAGAGGCAACC
LUCAT1-r	GCTCTTTATTTGTGAGGGGATG
LINC00160-f	ACAGCCAACCACCCATTCTCTT
LINC00160-r	AGGGAAGGCAGCAGACAAAACC
HOXA11-AS-f	CGGCTAACAAGGAGATTTGG
HOXA11-AS-r	AGGCTCAGGGATGGTAGTCC
HOTTIP-f	CAGAGGGAGCTTGGTGAAGG
HOTTIP-r	GTACAGAGACCCCTCGTCCT
HOTAIR-f	GGTAGAAAAAGCAACCACGAAGC
HOTAIR-r	ACATAAACCTCTGTCTGTGAGTGCC
HCP5-f	GCTGGACGATTCTCCTCACACT
HCP5-r	CTCCTCTCCAGGCACAGGTAAT
